# Supplementary material
Source: PubMed Central journal article supplement (PMC6790296)
Supplement: NIHMS1535120-supplement-251_2019_1125_MOESM3_ESM.pdf [file NIHMS1535120-supplement-251_2019_1125_MOESM3_ESM.pdf]

# Alignment of IPD exon 2 reference sequences

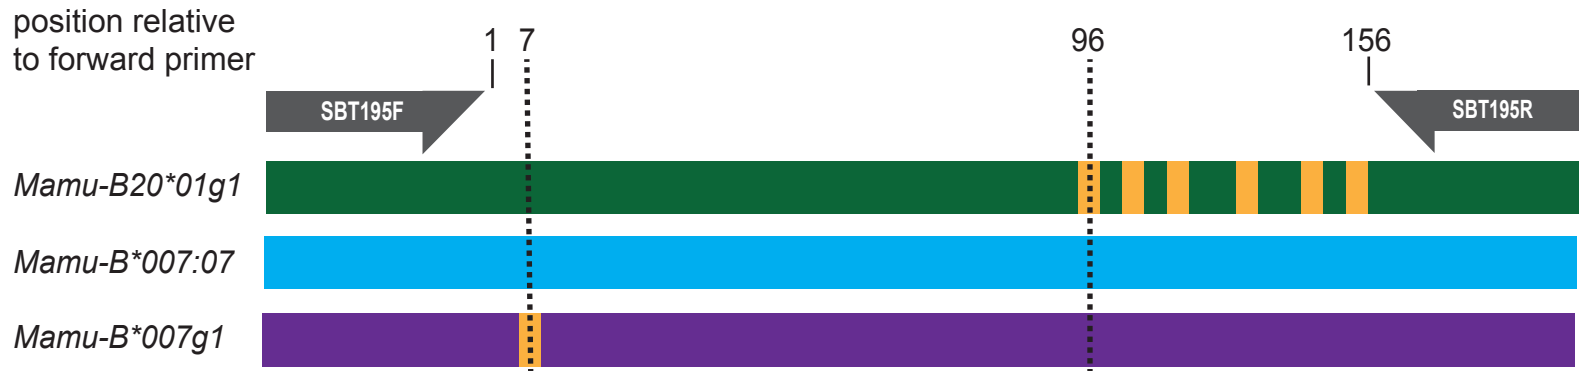

## Chimeric PCR amplification

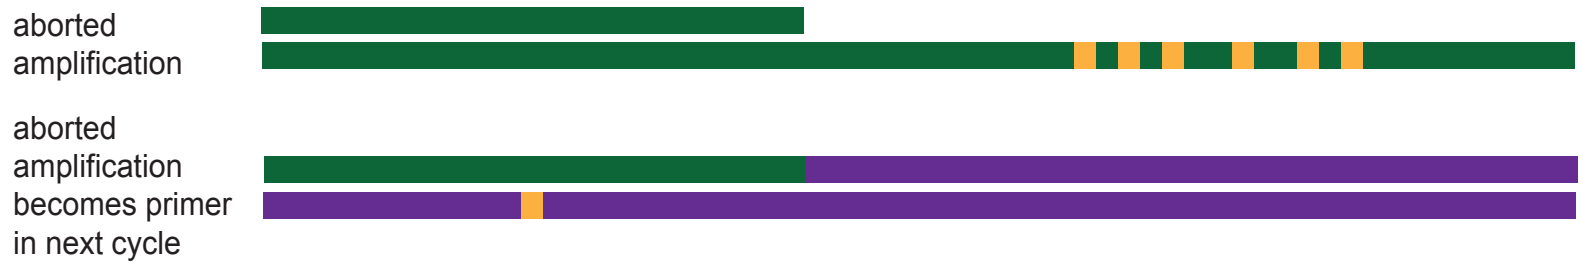

## Amplicon sequences after primer trimming

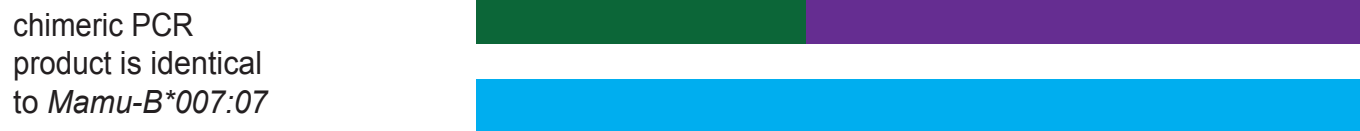

**Supplementary Fig 3.** Example Chimeric PCR amplification.
