# Supplementary material
Source: PubMed Central journal article supplement (PMC6790296)
Supplement: NIHMS1535120-supplement-251_2019_1125_MOESM4_ESM.pdf [file NIHMS1535120-supplement-251_2019_1125_MOESM4_ESM.pdf]

**Supplementary Table 1.** Fraction of total exome sequence reads corresponding to MHC class I and class II genes after target capture with the VCRome2.1 probe design alone

| GS ID          | SRA Accession | Total Raw Reads   | MHC-I           | DRB1/3/4/5      | DQA1            | DQB1            | DPA1            | DPB1            | MHC             | MHC % of total |
|----------------|---------------|-------------------|-----------------|-----------------|-----------------|-----------------|-----------------|-----------------|-----------------|----------------|
|                |               |                   | Reads Extracted |                |
| cy0642         | SAMN11281734  | 79,795,404        | 4,848           | 26,822          | 2,568           | 2,274           | 900             | 81,340          | 118,752         | 0.15           |
| cy0643         | SAMN11281735  | 86,265,844        | 4,408           | 26,930          | 2,542           | 2,320           | 936             | 74,370          | 111,506         | 0.13           |
| cy0646         | SAMN11281736  | 109,909,444       | 4,724           | 25,476          | 2,382           | 2,196           | 910             | 72,206          | 107,894         | 0.10           |
| cy0648         | SAMN11281737  | 106,315,304       | 5,558           | 34,442          | 2,966           | 2,714           | 1,092           | 97,254          | 144,026         | 0.14           |
| cy0649         | SAMN11281738  | 78,575,038        | 6,022           | 33,742          | 3,176           | 2,970           | 1,134           | 90,556          | 137,600         | 0.18           |
| cy0651         | SAMN11281739  | 102,890,862       | 6,686           | 33,194          | 3,388           | 3,094           | 1,294           | 94,532          | 142,188         | 0.14           |
| cy0652         | SAMN11281740  | 89,074,544        | 4,652           | 25,314          | 2,660           | 2,478           | 976             | 69,976          | 106,056         | 0.12           |
| cy0654         | SAMN11281741  | 99,169,798        | 5,294           | 30,328          | 2,924           | 2,756           | 1,042           | 79,664          | 122,008         | 0.12           |
| <b>Average</b> |               | <b>93,999,530</b> | <b>5,274</b>    | <b>29,531</b>   | <b>2,826</b>    | <b>2,600</b>    | <b>1,036</b>    | <b>82,487</b>   | <b>123,754</b>  | <b>0.13</b>    |
